# Supplementary material for: Guiding vertical growth and improving the buried interface of Pb–Sn perovskite films with 2D perovskite seeds for efficient narrow-bandgap perovskite solar cells and tandems
Source: Royal Society of Chemistry journal article supplement (doi:10.1039/d4ee05948d), 2025-01-01
Supplement: d4ee05948d2.xlsx [file d4ee05948d2.xlsx]

## Sheet: JV
Target Device					Control Device
Reverse		Forward			Reverse		Forward
Voltage (V)	J (mA cm-2)	Voltage (V)	J (mA cm-2)		Voltage (V)	J (mA cm-2)	Voltage (V)	J (mA cm-2)
0.88	-11.1813	-0.2	33.4878		0.88	-45.0149	-0.2	31.6227
0.86	0.35941	-0.18	33.49		0.86	-32.295	-0.18	31.3569
0.84	9.87389	-0.16	33.4841		0.84	-20.6457	-0.16	31.0898
0.82	17.336	-0.14	33.4791		0.82	-10.1362	-0.14	30.8097
0.8	22.7214	-0.12	33.4779		0.8	-1.05679	-0.12	30.643
0.78	26.5778	-0.1	33.4757		0.78	6.61445	-0.1	30.3457
0.76	29.1154	-0.08	33.4613		0.76	13.0023	-0.08	30.2836
0.74	30.6421	-0.06	33.4585		0.74	18.0486	-0.06	30.0048
0.72	31.8096	-0.04	33.4573		0.72	21.8297	-0.04	29.9553
0.7	32.2763	-0.02	33.4498		0.7	24.4468	-0.02	29.7276
0.68	32.8025	0	33.4419		0.68	26.4828	0	29.6592
0.66	33.0213	0.02	33.4377		0.66	27.9162	0.02	29.4981
0.64	33.1424	0.04	33.4234		0.64	28.9437	0.04	29.4162
0.62	33.3821	0.06	33.4216		0.62	29.6232	0.06	29.2894
0.6	33.3452	0.08	33.414		0.6	30.1564	0.08	29.1836
0.58	33.5076	0.1	33.4086		0.58	30.4723	0.1	29.1008
0.56	33.5111	0.12	33.4029		0.56	30.7342	0.12	28.977
0.54	33.5415	0.14	33.3974		0.54	30.8967	0.14	28.95
0.52	33.603	0.16	33.3968		0.52	31.0378	0.16	28.7884
0.5	33.6014	0.18	33.3747		0.5	31.0981	0.18	28.7798
0.48	33.6134	0.2	33.3677		0.48	31.1387	0.2	28.6329
0.46	33.6814	0.22	33.366		0.46	31.1648	0.22	28.6041
0.44	33.7521	0.24	33.3633		0.44	31.165	0.24	28.5005
0.42	33.8016	0.26	33.3606		0.42	31.176	0.26	28.4221
0.4	33.7003	0.28	33.3575		0.4	31.1442	0.28	28.3527
0.38	33.7422	0.3	33.3573		0.38	31.1419	0.3	28.2486
0.36	33.7309	0.32	33.3566		0.36	31.1186	0.32	28.2161
0.34	33.7422	0.34	33.355		0.34	31.0847	0.34	28.0873
0.32	33.6828	0.36	33.353		0.32	31.0818	0.36	28.067
0.3	33.6531	0.38	33.3403		0.3	31.048	0.38	27.9127
0.28	33.7323	0.4	33.3376		0.28	31.054	0.4	27.8949
0.26	33.6617	0.42	33.3277		0.26	31.0099	0.42	27.729
0.24	33.6927	0.44	33.3264		0.24	31.0398	0.44	27.7137
0.22	33.6234	0.46	33.3044		0.22	30.9871	0.46	27.5504
0.2	33.5937	0.48	33.2811		0.2	31.0428	0.48	27.4619
0.18	33.6729	0.5	33.2676		0.18	30.9857	0.5	27.3382
0.16	33.6927	0.52	33.2121		0.16	31.0648	0.52	27.1533
0.14	33.6432	0.54	33.1824		0.14	30.9949	0.54	26.9997
0.12	33.6333	0.56	33.0991		0.12	31.0443	0.56	26.6893
0.1	33.6333	0.58	33.0742		0.1	31.0255	0.58	26.4123
0.08	33.5639	0.6	32.933		0.08	31.0596	0.6	25.8827
0.06	33.5639	0.62	32.8174		0.06	31.0543	0.62	25.3325
0.04	33.5441	0.64	32.5888		0.04	31.0601	0.64	24.4042
0.02	33.5045	0.66	32.3465		0.02	31.0982	0.66	23.2982
0	33.5342	0.68	31.9118		0	31.0714	0.68	22.0132
-0.02	33.5305	0.7	31.3081		-0.02	31.1407	0.7	19.8224
-0.04	33.3634	0.72	30.3732		-0.04	31.0829	0.72	16.758
-0.06	33.3158	0.74	29.0009		-0.06	31.1771	0.74	12.6915
-0.08	33.3018	0.76	26.941		-0.08	31.0892	0.76	7.22841
-0.1	33.2997	0.78	23.9277		-0.1	31.2161	0.78	1.86148
-0.12	33.2575	0.8	19.7644		-0.12	31.1306	0.8	-6.65089
-0.14	33.2722	0.82	14.0174		-0.14	31.2171	0.82	-18.3782
-0.16	33.2512	0.84	6.48115		-0.16	31.171	0.84	-31.9712
-0.18	33.2598	0.86	-2.89216		-0.18	31.2354	0.86	-48.9485
-0.2	33.2566	0.88	-14.0525		-0.2	31.2162	0.88	-68.5531

## Sheet: EQE
Targe Device					Control Device
Wavelength(nm)	EQE (%)	Integrated Jsc (mA cm-2)			Wavelength(nm)	EQE (%)	Integrated Jsc (mA cm-2)
300	0	0			300	0	0
305	15.9	0.000196962			305	15.83	1.923E-4
310	27.1	0.00138			310	23.69	0.00123
315	41.52	0.00649			315	33.88	0.00535
320	52.94	0.018			320	51.53	0.01588
325	46.12	0.03404			325	47.95	0.03186
330	47.37	0.0591			330	48.84	0.05725
335	51.26	0.09088			335	54.49	0.08999
340	56.46	0.12781			340	57.9	0.1275
345	60.13	0.16708			345	57.68	0.1656
350	62.02	0.21104			350	63.64	0.2088
355	64.55	0.26449			355	62.82	0.2607
360	66.31	0.32273			360	63.54	0.3158
365	66.66	0.38372			365	64.16	0.3732
370	64.94	0.45339			370	62.37	0.4389
375	64.75	0.51857			375	63.17	0.5008
380	65.73	0.58528			380	64.33	0.5648
385	64.4	0.65535			385	63.87	0.6325
390	64.24	0.73205			390	63.8	0.7071
395	65.09	0.8162			395	64.44	0.7889
400	67.8	0.92494			400	65.66	0.8928
405	69.3	1.05468			405	66.14	1.015
410	71.18	1.1832			410	68.11	1.135
415	72.11	1.32396			415	70.66	1.269
420	74.76	1.47084			420	71.39	1.409
425	77.25	1.62996			425	74.04	1.558
430	79.15	1.77174			430	76.27	1.691
435	81.13	1.92882			435	78.06	1.84
440	83.65	2.12364			440	80.68	2.024
445	84.67	2.3409			445	82.46	2.231
450	86.35	2.58162			450	83.07	2.458
455	87.19	2.8305			455	85.19	2.695
460	89.26	3.08448			460	85.89	2.936
465	89.78	3.3456			465	86.95	3.184
470	90.67	3.60978			470	87.65	3.434
475	90.28	3.88722			475	88.25	3.699
480	90.84	4.17486			480	88.02	3.974
485	90.84	4.46148			485	88.6	4.247
490	90.81	4.7532			490	88.32	4.525
495	90.92	5.05512			495	88.41	4.813
500	90.63	5.3499			500	88.51	5.095
505	90.7	5.64264			505	88.18	5.374
510	90.3	5.9364			510	87.99	5.654
515	90.49	6.22914			515	87.95	5.934
520	90.05	6.5229			520	87.65	6.214
525	89.8	6.8238			525	87.17	6.501
530	89.36	7.12674			530	87.16	6.79
535	89.75	7.4307			535	86.53	7.079
540	89.28	7.73058			540	86.52	7.362
545	89.53	8.03352			545	85.76	7.649
550	89.19	8.3436			550	85.59	7.94
555	89.63	8.6598			555	85.51	8.237
560	89.54	8.9709			560	85.77	8.528
565	89.67	9.282			565	85.13	8.819
570	89.01	9.59412			570	85.21	9.111
575	89.14	9.90522			575	85.25	9.402
580	89.37	10.2204			580	85.13	9.698
585	89.55	10.5468			585	85.15	10
590	89.5	10.8528			590	84.36	10.29
595	89.45	11.1486			595	84.27	10.57
600	89.31	11.475			600	84.44	10.87
605	89.55	11.8014			605	84.3	11.18
610	88.68	12.1278			610	83.93	11.48
615	88.78	12.4644			615	84.01	11.78
620	88.64	12.7908			620	83.67	12.09
625	88.8	13.1172			625	83.68	12.39
630	88.67	13.4334			630	83.41	12.69
635	88.47	13.77			635	83.06	12.99
640	88.63	14.0964			640	82.96	13.3
645	88.67	14.4432			645	83.11	13.61
650	88.61	14.7696			650	83.6	13.91
655	88.71	15.096			655	83.5	14.21
660	88.82	15.4224			660	84.18	14.52
665	89.33	15.7692			665	84.21	14.84
670	89.45	16.116			670	84.4	15.16
675	89.13	16.4628			675	84.08	15.48
680	88.26	16.8096			680	82.97	15.8
685	87.4	17.1462			685	83.11	16.12
690	87.2	17.4624			690	82.78	16.41
695	87.28	17.7684			695	82.73	16.69
700	87.58	18.0846			700	82.94	16.99
705	88.03	18.4212			705	83.29	17.3
710	88.6	18.7578			710	83.64	17.61
715	88.92	19.0944			715	83.99	17.92
720	89.22	19.38			720	84.13	18.19
725	89.59	19.6554			725	84.87	18.44
730	89.94	19.941			730	84.99	18.71
735	89.98	20.2674			735	85.56	19.01
740	90.04	20.5938			740	85.68	19.32
745	90	20.9406			745	84.87	19.63
750	89.89	21.2772			750	85.06	19.95
755	90.08	21.624			755	84.76	20.27
760	89.66	21.8076			760	85.31	20.44
765	89.98	21.9606			765	85.3	20.58
770	89.64	22.236			770	85.39	20.83
775	89.85	22.5624			775	84.94	21.14
780	89.64	22.899			780	85.48	21.46
785	89.6	23.2356			785	84.59	21.77
790	89.78	23.562			790	84.57	22.07
795	89.57	23.8782			795	85.22	22.37
800	89.59	24.1944			800	85	22.66
805	89.29	24.5106			805	85.92	22.96
810	89.24	24.8268			810	85.56	23.25
815	88.92	25.1124			815	84.96	23.52
820	88.49	25.3674			820	84.43	23.76
825	87.65	25.6428			825	84.42	24.02
830	88.11	25.9284			830	84.29	24.29
835	87.71	26.2242			835	83.54	24.56
840	87.4	26.52			840	83.25	24.84
845	86.76	26.8362			845	82.73	25.13
850	86.61	27.1116			850	82.67	25.4
855	86.2	27.387			855	81.63	25.65
860	85.54	27.6828			860	80.21	25.92
865	85.28	27.9786			865	79.81	26.19
870	84.86	28.2642			870	79.49	26.46
875	83.73	28.5498			875	78.14	26.72
880	83.7	28.8354			880	78.11	26.98
885	83.33	29.121			885	77.49	27.24
890	82.02	29.4066			890	76.82	27.5
895	82.32	29.6616			895	76.54	27.73
900	81.06	29.8962			900	76.34	27.95
905	80.39	30.1308			905	75.74	28.17
910	80.14	30.345			910	74.99	28.36
915	79.14	30.5388			915	74.46	28.54
920	78.52	30.753			920	74.26	28.74
925	77.81	30.9672			925	74.16	28.94
930	76.86	31.1202			930	73.73	29.09
935	75.64	31.2222			935	72.95	29.18
940	73.67	31.3344			940	72.2	29.28
945	71.34	31.4466			945	70.76	29.39
950	69.17	31.5078			950	68.62	29.46
955	65.96	31.5792			955	66.25	29.52
960	61.88	31.671			960	62.67	29.62
965	57.7	31.7832			965	58.04	29.73
970	52.71	31.9158			970	54.03	29.85
975	47.73	32.028			975	47.92	29.97
980	42.03	32.1402			980	42.17	30.08
985	36.81	32.2422			985	35.6	30.18
990	31.4	32.3442			990	28.98	30.27
995	26.31	32.4258			995	22.88	30.34
1000	22.13	32.4972			1000	17.72	30.4
1005	17.93	32.5584			1005	14.12	30.45
1010	14.28	32.5992			1010	10.79	30.48
1015	11.4	32.64			1015	7.957	30.51
1020	8.919	32.6706			1020	5.801	30.53
1025	6.599	32.691			1025	4.405	30.54
1030	4.652	32.7012			1030	3.15	30.55
1035	3.523	32.7216			1035	2.349	30.56
1040	2.64	32.7216			1040	2.294	30.57
1045	2.365	32.7318			1045	2.005	30.57
1050	2.259	32.742			1050	1.836	30.58
1055	1.635	32.742			1055	1.776	30.58
1060	1.782	32.7522			1060	1.324	30.59
1065	1.638	32.7522			1065	1.667	30.59
1070	1.514	32.7624			1070	1.497	30.59
1075	1.284	32.7624			1075	1.501	30.6
1080	1.35	32.7624			1080	1.642	30.6
1085	1.232	32.7726			1085	1.519	30.61
1090	1.55	32.7726			1090	1.468	30.61
1095	1.562	32.7726			1095	1.519	30.61
1100	1.362	32.7828			1100	1.502	30.62

## Sheet: JV-Tandem
NBG before filter		NBG after filter		S-T WBG
Voltage (V)	J (mA cm-2)	Voltage (V)	J (mA cm-2)	Voltage (V)	J (mA cm-2)
0.9	10.1619	0.88	9.86693	1.3	18.1528
0.88	-1.30746	0.86	2.29486	1.28	6.67601
0.86	-10.3822	0.84	-2.87944	1.26	-1.29511
0.84	-17.1591	0.82	-6.24473	1.24	-6.90678
0.82	-21.9603	0.8	-8.3619	1.22	-10.8271
0.8	-25.251	0.78	-9.68572	1.2	-13.4168
0.78	-27.4547	0.76	-10.5354	1.18	-15.0059
0.76	-28.9139	0.74	-11.0759	1.16	-16.113
0.74	-29.9213	0.72	-11.4607	1.14	-16.7414
0.72	-30.7141	0.7	-11.7014	1.12	-17.2619
0.7	-31.248	0.68	-11.8979	1.1	-17.4892
0.68	-31.5738	0.66	-12.0215	1.08	-17.7704
0.66	-31.9177	0.64	-12.1153	1.06	-17.8246
0.64	-32.1077	0.62	-12.1801	1.04	-18.0058
0.62	-32.3611	0.6	-12.231	1.02	-17.9947
0.6	-32.4878	0.58	-12.2661	1	-18.0887
0.58	-32.6417	0.56	-12.2955	0.98	-18.0754
0.56	-32.8045	0.54	-12.3206	0.96	-18.104
0.54	-32.877	0.52	-12.331	0.94	-18.0888
0.52	-33.0127	0.5	-12.3511	0.92	-18.097
0.5	-33.0489	0.48	-12.3491	0.9	-18.0661
0.48	-33.1394	0.46	-12.374	0.88	-18.0822
0.46	-33.1484	0.44	-12.368	0.86	-18.04
0.44	-33.2118	0.42	-12.3798	0.84	-18.0773
0.42	-33.2208	0.4	-12.3757	0.82	-18.0233
0.4	-33.257	0.38	-12.3831	0.8	-18.0735
0.38	-33.2389	0.36	-12.3849	0.78	-18.0118
0.36	-33.2555	0.34	-12.3916	0.76	-18.0588
0.34	-33.2909	0.32	-12.3854	0.74	-18.0119
0.32	-33.2466	0.3	-12.3976	0.72	-18.034
0.3	-33.2821	0.28	-12.3875	0.7	-18.0237
0.28	-33.3175	0.26	-12.4004	0.68	-18.0163
0.26	-33.257	0.24	-12.3934	0.66	-18.0318
0.24	-33.2732	0.22	-12.3957	0.64	-18.0069
0.22	-33.2998	0.2	-12.3965	0.62	-18.0249
0.2	-33.2299	0.18	-12.388	0.6	-18.0221
0.18	-33.2112	0.16	-12.4034	0.58	-18.0123
0.16	-33.2821	0.14	-12.3869	0.56	-18.0278
0.14	-33.257	0.12	-12.4039	0.54	-18.0094
0.12	-33.2389	0.1	-12.3944	0.52	-18.03
0.1	-33.2998	0.08	-12.3976	0.5	-18.025
0.08	-33.2998	0.06	-12.3956	0.48	-18.0162
0.06	-33.3353	0.04	-12.397	0.46	-18.0417
0.04	-33.2661	0.02	-12.3945	0.44	-17.9965
0.02	-33.257	0	-12.3937	0.42	-18.0544
0	-33.3264	-0.02	-12.389	0.4	-17.985
-0.02	-33.2027	-0.04	-12.398	0.38	-18.0665
-0.04	-33.257	-0.06	-12.39	0.36	-17.9861
-0.06	-32.9584	-0.08	-12.3887	0.34	-18.0519
-0.08	-32.6172	-0.1	-12.389	0.32	-17.9981
-0.1	-32.5862	-0.12	-12.3846	0.3	-18.0426
-0.12	-32.5639	-0.14	-12.3797	0.28	-18.022
-0.14	-32.5697	-0.16	-12.3809	0.26	-18.0383
-0.16	-32.5156	-0.18	-12.3756	0.24	-18.0333
-0.18	-32.548	-0.2	-12.3735	0.22	-18.0645
-0.2	-32.461			0.2	-18.0296
				0.18	-18.097
				0.16	-18.0247
				0.14	-18.1208
				0.12	-18.0274
				0.1	-18.1328
				0.08	-18.0438
				0.06	-18.1322
				0.04	-18.063
				0.02	-18.1293
				0	-18.0835
				-0.02	-18.1325
				-0.04	-18.0952
				-0.06	-18.149
				-0.08	-18.0946
				-0.1	-18.1683
				-0.12	-18.087
				-0.14	-18.1824
				-0.16	-18.0894
				-0.18	-18.185
				-0.2	-18.1083

## Sheet: EQE-Tandem
NBG after filter				S-T WBG
Wavelength(nm)	EQE (%)	Integrated Jsc (mA cm-2)		Wavelength(nm)	EQE (%)	Integrated Jsc (mA cm-2)
480	0.85012	0		300	--	--
485	1.23596	0.00318		305	64.2562	0
490	1.33136	0.0071		310	57.6623	0.17055
495	0.9487	0.01058		315	49.971	0.32111
500	1.27094	0.01397		320	61.6228	0.47722
505	1.42782	0.01809		325	50.7234	0.63438
510	1.99386	0.02331		330	54.9975	0.78227
515	1.58364	0.02878		335	61.0376	0.94458
520	1.63346	0.03369		340	69.8574	1.12769
525	2.48464	0.03997		345	66.9314	1.31904
530	2.49206	0.04757		350	76.7439	1.52002
535	2.98496	0.05593		355	73.6089	1.73034
540	4.44882	0.06728		360	80.1611	1.94545
545	4.55376	0.08102		365	79.7222	2.1691
550	4.51878	0.09487		370	82.9408	2.39665
555	5.26608	0.10981		375	84.1112	2.63033
560	5.94872	0.12692		380	83.3902	2.86465
565	5.95084	0.14509		385	80.4014	3.09377
570	6.65362	0.16433		390	81.2897	3.31995
575	7.34686	0.1857		395	81.3733	3.5475
580	8.0878	0.20926		400	79.2206	3.77215
585	8.64642	0.23481		405	80.1089	3.99503
590	8.65172	0.26121		410	79.0847	4.21772
595	9.15522	0.28839		415	79.9521	4.44019
600	9.7838	0.3173		420	80.0252	4.66398
605	10.5576	0.34835		425	81.551	4.89
610	10.759	0.38089		430	82.4915	5.11948
615	11.0028	0.41411		435	82.3765	5.3501
620	11.5752	0.44858		440	82.481	5.58072
625	11.978	0.48453		445	84.0694	5.8137
630	12.0734	0.52125		450	85.1248	6.05038
635	12.0522	0.55807		455	85.0413	6.28842
640	12.3914	0.59539		460	85.0622	6.52637
645	12.1264	0.63281		465	85.5324	6.76501
650	12.4656	0.67035		470	85.3756	7.00409
655	13.4302	0.70988		475	85.0203	7.24245
660	14.9884	0.75326		480	86.3057	7.48212
665	18.4016	0.80423		485	86.1594	7.72337
670	24.5708	0.86983		490	87.6955	7.96657
675	32.383	0.95677		495	87.2985	8.21137
680	39.6546	1.06673		500	87.8628	8.45639
685	46.7566	1.19863		505	89.1063	8.70395
690	52.6714	1.35041		510	89.2212	8.95341
695	56.9856	1.5178		515	88.9496	9.20264
700	59.6568	1.69585		520	89.0645	9.45166
705	60.7062	1.87958		525	89.4303	9.70135
710	61.3104	2.06584		530	88.6779	9.9505
715	61.5118	2.25333		535	88.5734	10.1984
720	61.3528	2.44088		540	88.0613	10.4455
725	60.6532	2.62712		545	88.3121	10.6923
730	60.7592	2.81245		550	88.427	10.9395
735	60.0596	2.99688		555	86.8387	11.1847
740	59.3388	3.17914		560	86.1176	11.4266
745	59.6462	3.36077		565	85.4488	11.6666
750	59.3282	3.54238		570	85.4697	11.9057
755	59.466	3.72371		575	84.8636	12.144
760	58.6286	3.90398		580	83.2857	12.3792
765	58.8936	4.08338		585	82.2824	12.6108
770	58.8512	4.26311		590	81.8331	12.8404
775	59.2434	4.44338		595	82.0003	13.0696
780	59.3706	4.62445		600	81.645	13.2985
785	59.5084	4.80591		605	81.3524	13.5265
790	59.519	4.98761		610	81.018	13.7536
795	59.413	5.16915		615	80.8821	13.9801
800	60.0172	5.35146		620	80.2343	14.2055
805	60.2292	5.53502		625	79.6072	14.4291
810	60.8546	5.71985		630	78.6772	14.6505
815	60.5472	5.90516		635	78.2488	14.87
820	60.1656	6.08943		640	77.3187	15.0877
825	60.4518	6.27355		645	76.7231	15.3031
830	60.4518	6.45811		650	75.9707	15.5167
835	60.6426	6.64296		655	75.9602	15.7293
840	60.7062	6.82819		660	74.8421	15.9402
845	60.0172	7.01248		665	73.8807	16.1483
850	59.6674	7.19517		670	72.3027	16.3528
855	59.1056	7.37648		675	68.5093	16.5497
860	58.9784	7.55673		680	61.1839	16.7311
865	58.5014	7.73606		685	50.7861	16.8878
870	59.0632	7.91552		690	37.3997	17.0111
875	58.5332	8.09503		695	24.8074	17.0982
880	58.0244	8.27295		700	13.4065	17.1516
885	57.5686	8.4494		705	6.36947	17.1793
890	57.0916	8.62443		710	2.03272	17.191
895	57.028	8.79863		715	0.62615	17.1947
900	57.4838	8.97343		720	0.42656	17.1962
905	57.4626	9.14889		725	0.71393	17.1978
910	57.8654	9.32494		730	0.30638	17.1992
915	57.2506	9.50066		735	0.50702	17.2004
920	57.1764	9.67533		740	0.55927	17.2019
925	56.6782	9.84913		745	0.96578	17.204
930	56.1482	10.0214		750	1.17582	17.207
935	54.9398	10.1909		755	1.16642	17.2103
940	54.1448	10.3575		760	1.16223	17.2135
945	53.0636	10.5211
950	51.728	10.6811
955	49.6928	10.8359
960	47.3078	10.984
965	43.725	11.1229
970	39.1458	11.2494
975	34.8316	11.3623
980	29.8178	11.461
985	25.4188	11.5453
990	20.511	11.6154
995	16.1756	11.6715
1000	12.6988	11.7155
1005	8.97078	11.7486
1010	6.67164	11.7725
1015	4.79544	11.79
1020	3.11746	11.8021
1025	2.18572	11.8102
1030	1.57834	11.8159
1035	1.4151	11.8205
1040	0.83104	11.8239
1045	0.71126	11.8263
1050	0.26288	11.8277
1055	0.4717	11.8289
1060	0.54166	11.8304
1065	0.62116	11.8322
1070	0.51516	11.8339
1075	0.38478	11.8353
1080	0.39644	11.8365
1085	0.71974	11.8382
1090	0.61586	11.8402
1095	0.66886	11.8422
1100	0.57982	11.8441
